# Supplementary material for: RPM-1 is localized to distinct subcellular compartments and regulates axon length in GABAergic motor neurons
Source: PubMed Central journal article supplement (PMC4077836; doi:10.1186/1749-8104-9-10), 2014-05-10

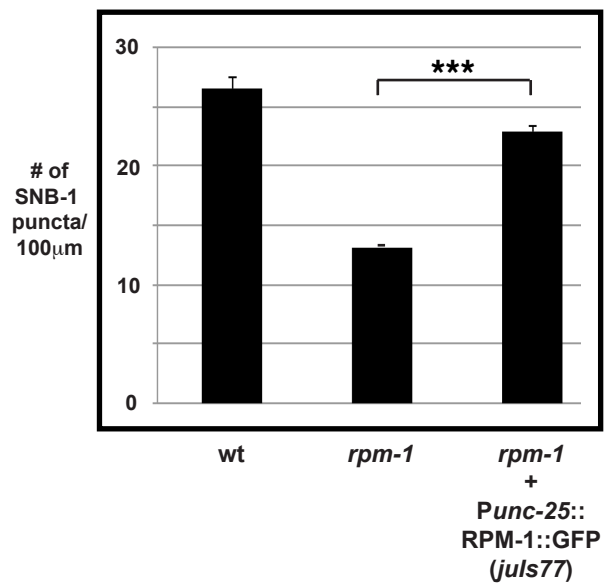

Supplement: 1749-8104-9-10-S1.pdf [file 1749-8104-9-10-S1.pdf]
